# Supplementary material for: Pickering polymerization of styrene stabilized by starch-based nanospheres
Source: Royal Society of Chemistry journal article supplement (doi:10.1039/c6py00341a), 2016-01-01
Supplement: c6py00341a1.pdf [file c6py00341a1.pdf]

## Electronic Supplementary information (ESI)

### Pickering polymerization of styrene stabilized by starch-based nanospheres

Xiaopeng Pei,<sup>a,b</sup> Ying Tan,<sup>a,\*</sup> Kun Xu,<sup>a</sup> Chang Liu,<sup>c</sup> Cuige Lu,<sup>a</sup> and Pixin Wang<sup>a,\*</sup>

<sup>a</sup>Key Laboratory of Polymer Ecomaterials, Changchun Institute of Applied Chemistry, Chinese Academy of Sciences, Changchun 130022, P. R. China.

<sup>b</sup>Graduate University of Chinese Academy of Sciences, Beijing 100049, P. R. China.

<sup>c</sup>Changchun University of Technology, Changchun, 130012.

Tel. and Fax: +86 431 85262629,

E-mail: tanying@ciac.ac.cn (Y. Tan), pxwang@ciac.ac.cn (P. Wang)

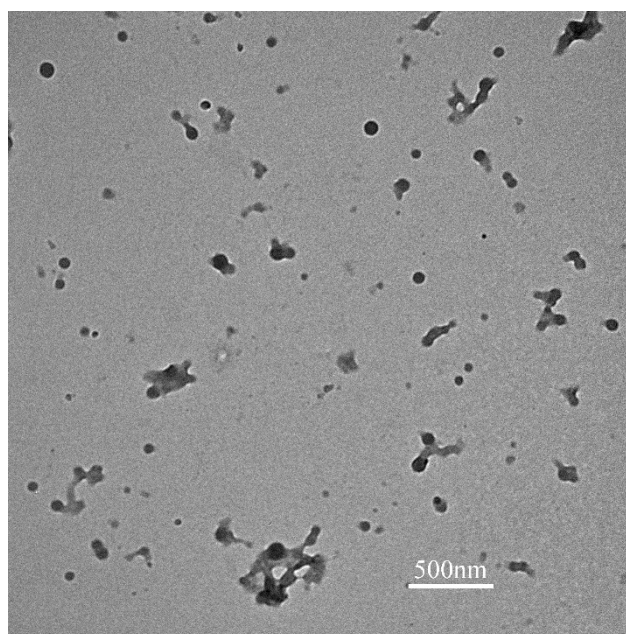

Figure S1 TEM image of the SNPs

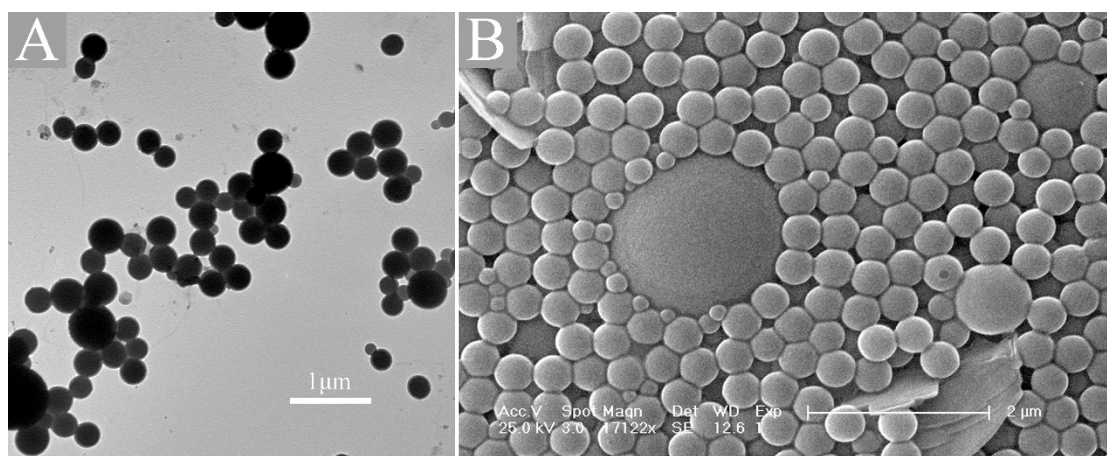

Figure S2 TEM image (A) and SEM image (B) of the pure PS particles without SNPs (entry 0)
